# Supplementary material for: Phenotypic and Proteomic Insights into Differential Cadmium Accumulation in Maize Kernels
Source: Genes (Basel). 2023 Dec 13;14(12):2204. doi: 10.3390/genes14122204 (PMC10742529; doi:10.3390/genes14122204)
Supplement: Supplementary file 1 [file genes-14-02204-s001.zip]

Archive with 4 entries (4 files):
- Figure S1-5.pdf
- Table S1.xlsx
- Table S2.xlsx
- Table S3.xlsx
