# Supplementary material for: Phenotypic and Proteomic Insights into Differential Cadmium Accumulation in Maize Kernels
Source: Genes (Basel). 2023 Dec 13;14(12):2204. doi: 10.3390/genes14122204 (PMC10742529; doi:10.3390/genes14122204)
Supplement: Supplementary file 1 [file genes-14-02204-s001.zip › Table S1.xlsx]

## Sheet: Sheet1
Table S1. The information of 24 common differentially enriched proteins in B73 and mutant.
Accession	B73 Control vs Treatment		Mutant Control vs Treatment		Annotation
	FoldChange	p-value	FoldChange	p-value
A0A1D6F5A7	0.732	0.00188986	2.115	0.00391457	Putative non-specific lipid-transfer protein 2 OS=Zea mays OX=4577 GN=103647985 PE=3 SV=1
A0A1D6IY22	0.526	0.0189832	0.454	0.0186712	Alpha-humulene/(-)-(E)-beta-caryophyllene synthase OS=Zea mays OX=4577 GN=103641099 PE=4 SV=1
A0A1D6L7F8	0.71	6.46791e-06	1.66	0.000883302	Globulin-2 OS=Zea mays OX=4577 GN=542382 PE=4 SV=1
A0A1D6N0K3	0.748	0.0114783	0.557	0.00233331	Peroxidase OS=Zea mays OX=4577 GN=ZEAMMB73_Zm00001d042022 PE=3 SV=1
A8WES6	1.366	0.0409537	1.344	0.00283342	ZCN15 OS=Zea mays OX=4577 GN=ZCN15 PE=2 SV=1
B4FCH2	0.652	0.000646306	0.7	0.000196158	Histone H3 OS=Zea mays OX=4577 GN=100192746 PE=2 SV=1
B4FJ41	0.744	1.33113e-05	1.315	4.90743e-06	Oleosin OS=Zea mays OX=4577 GN=542263 PE=2 SV=1
B4FTS6	0.444	0.00118233	0.597	0.00247435	Chitinase OS=Zea mays OX=4577 GN=100283098 PE=2 SV=1
B4G1T3	0.685	0.000192163	0.731	0.000275515	Chitinase chem5 OS=Zea mays OX=4577 GN=542525 PE=2 SV=1
B6SI37	0.522	1.14913e-05	2.059	0.00026359	Embryo specific protein1 OS=Zea mays OX=4577 GN=542384 PE=2 SV=1
B6SI42	0.672	0.016086	1.593	0.00219464	Oleosin OS=Zea mays OX=4577 GN=100280594 PE=2 SV=1
B6SIZ2	0.755	0.000460697	1.537	2.57747e-05	Oleosin OS=Zea mays OX=4577 GN=100280642 PE=2 SV=1
B6SLA2	0.649	0.000105708	1.456	0.000734133	AT3g10020/T22K18_16-like protein OS=Zea mays OX=4577 GN=100278780 PE=2 SV=1
B6SLF6	0.689	1.23793e-06	2.769	4.78524e-07	Antimicrobial peptide MBP-1 OS=Zea mays OX=4577 GN=100274918 PE=2 SV=1
B6T8E4	0.616	0.00665892	2.012	0.00181652	Embryo specific protein5 OS=Zea mays OX=4577 GN=542280 PE=2 SV=1
C0HFQ1	0.748	5.70911e-06	1.846	6.995e-08	Dirigent protein OS=Zea mays OX=4577 GN=100304441 PE=2 SV=1
C0HII8	0.703	0.000353054	1.787	0.00150884	Bowman-Birk type trypsin inhibitor OS=Zea mays OX=4577 GN=100274196 PE=2 SV=1
C0PD90	0.764	0.000383215	1.356	2.12748e-05	BOWMAN_BIRK domain-containing protein OS=Zea mays OX=4577 GN=103649857 PE=2 SV=1
C0PDX9	0.678	0.000845748	2.03	8.91001e-05	Dirigent protein OS=Zea mays OX=4577 GN=100274142 PE=2 SV=1
C0PGM3	0.757	0.0356372	1.51	0.0026527	Globulin-1 S allele OS=Zea mays OX=4577 GN=ZEAMMB73_Zm00001d033447 PE=2 SV=1
K7TID5	0.768	0.000886991	1.35	0.000587354	Peroxidase OS=Zea mays OX=4577 GN=ZEAMMB73_Zm00001d024753 PE=3 SV=1
P04706	0.723	2.24374e-05	1.365	0.00604272	Glutelin-2 OS=Zea mays OX=4577 PE=1 SV=1
P81009	0.731	0.00246103	1.484	0.000143385	Defensin-like protein 2 OS=Zea mays OX=4577 PE=1 SV=1
P93627	0.616	0.0040492	0.721	0.000481883	Cysteine proteinase inhibitor OS=Zea mays OX=4577 GN=gCC PE=2 SV=1
