# Supplementary material for: Phenotypic and Proteomic Insights into Differential Cadmium Accumulation in Maize Kernels
Source: Genes (Basel). 2023 Dec 13;14(12):2204. doi: 10.3390/genes14122204 (PMC10742529; doi:10.3390/genes14122204)
Supplement: Supplementary file 1 [file genes-14-02204-s001.zip › Table S2.xlsx]

## Sheet: Sheet1
Table S2. The KEGG pathways associated with differentially enriched proteins in B73.
KEGG pathway	Fisher's exact test p value	Fold Enrichment	Protein accession	Protein description
map00520 Amino sugar and nucleotide sugar metabolism	0.0469945	3.65	A0A1D6HTN9	Acidic endochitinase OS=Zea mays OX=4577 GN=ZEAMMB73_Zm00001d018966 PE=4 SV=1
map00520 Amino sugar and nucleotide sugar metabolism	0.0469945	3.65	B4FTS6	Chitinase OS=Zea mays OX=4577 GN=100283098 PE=2 SV=1
map00520 Amino sugar and nucleotide sugar metabolism	0.0469945	3.65	B4G1T3	Chitinase chem5 OS=Zea mays OX=4577 GN=542525 PE=2 SV=1
map00940 Phenylpropanoid biosynthesis	0.14996	2.9	K7TID5	Peroxidase OS=Zea mays OX=4577 GN=ZEAMMB73_Zm00001d024753 PE=3 SV=1
map00940 Phenylpropanoid biosynthesis	0.14996	2.9	A0A1D6N0K3	Peroxidase OS=Zea mays OX=4577 GN=ZEAMMB73_Zm00001d042022 PE=3 SV=1
map03013 RNA transport	0.128367	2.38	A0A1D6HP23	Trimeric LpxA-like enzyme OS=Zea mays OX=4577 GN=100272405 PE=4 SV=1
map03013 RNA transport	0.128367	2.38	A0A1D6PPU9	Nuclear pore complex protein OS=Zea mays OX=4577 GN=100272594 PE=3 SV=1
map03013 RNA transport	0.128367	2.38	A0A1D6DXC1	Eukaryotic translation initiation factor 3 subunit C OS=Zea mays OX=4577 GN=100272475 PE=3 SV=1
map04141 Protein processing in endoplasmic reticulum	0.165863	2.12	Q41815	Heat shock protein 26 OS=Zea mays OX=4577 GN=HSP26 PE=2 SV=1
map04141 Protein processing in endoplasmic reticulum	0.165863	2.12	A0A1D6HWM2	Calreticulin OS=Zea mays OX=4577 GN=542732 PE=3 SV=1
map04141 Protein processing in endoplasmic reticulum	0.165863	2.12	C0P8J4	22.0 kDa heat shock protein OS=Zea mays OX=4577 GN=100284772 PE=2 SV=1
