# Supplementary material for: Phenotypic and Proteomic Insights into Differential Cadmium Accumulation in Maize Kernels
Source: Genes (Basel). 2023 Dec 13;14(12):2204. doi: 10.3390/genes14122204 (PMC10742529; doi:10.3390/genes14122204)
Supplement: Supplementary file 1 [file genes-14-02204-s001.zip › Table S3.xlsx]

## Sheet: Sheet1
Table S3. The KEGG pathways associated with differentially enriched proteins in mutant.
KEGG pathway	Fisher's exact test p value	Fold Enrichment	Protein accession	Protein description
map00270 Cysteine and methionine metabolism	0.245633	2.1	A0A1D6NAB1	Homocysteine S-methyltransferase4 OS=Zea mays OX=4577 GN=ZEAMMB73_Zm00001d043302 PE=4 SV=1
map00270 Cysteine and methionine metabolism	0.245633	2.1	Q9AXT8	DNA (cytosine-5)-methyltransferase 1 OS=Zea mays OX=4577 GN=MET2A PE=1 SV=1
map00460 Cyanoamino acid metabolism	0.0662546	4.72	B4FYX5	Pentatricopeptide (PPR) repeat protein-like OS=Zea mays OX=4577 GN=100274074 PE=2 SV=1
map00460 Cyanoamino acid metabolism	0.0662546	4.72	A0A1D6JAB3	Beta-glucosidase 47 OS=Zea mays OX=4577 GN=100193998 PE=3 SV=1
map00480 Glutathione metabolism	0.226386	2.23	B6T033	Glutathione S-transferase GSTU6 OS=Zea mays OX=4577 GN=541850 PE=2 SV=1
map00480 Glutathione metabolism	0.226386	2.23	Q9FQA3	Glutathione transferase GST 23 OS=Zea mays OX=4577 PE=2 SV=1
map00500 Starch and sucrose metabolism	0.190039	1.99	A0A1D6DUP7	Beta-fructofuranosidase insoluble isoenzyme CWINV3 OS=Zea mays OX=4577 GN=ZEAMMB73_Zm00001d001943 PE=3 SV=1
map00500 Starch and sucrose metabolism	0.190039	1.99	A0A1D6FHP7	Endoglucanase OS=Zea mays OX=4577 GN=ZEAMMB73_Zm00001d009097 PE=3 SV=1
map00500 Starch and sucrose metabolism	0.190039	1.99	A0A1D6JAB3	Beta-glucosidase 47 OS=Zea mays OX=4577 GN=100193998 PE=3 SV=1
map00520 Amino sugar and nucleotide sugar metabolism	0.368575	1.56	B4FTS6	Chitinase OS=Zea mays OX=4577 GN=100283098 PE=2 SV=1
map00520 Amino sugar and nucleotide sugar metabolism	0.368575	1.56	B4G1T3	Chitinase chem5 OS=Zea mays OX=4577 GN=542525 PE=2 SV=1
map00620 Pyruvate metabolism	0.272702	1.96	C0P8I4	2-isopropylmalate synthase OS=Zea mays OX=4577 GN=ZEAMMB73_Zm00001d023243 PE=2 SV=1
map00620 Pyruvate metabolism	0.272702	1.96	A0A1D6GCA1	Malic enzyme OS=Zea mays OX=4577 GN=ZEAMMB73_Zm00001d012764 PE=3 SV=1
map00630 Glyoxylate and dicarboxylate metabolism	0.0426874	3.82	B4FYX5	Pentatricopeptide (PPR) repeat protein-like OS=Zea mays OX=4577 GN=100274074 PE=2 SV=1
map00630 Glyoxylate and dicarboxylate metabolism	0.0426874	3.82	B4FMX4	Glutamine synthetase OS=Zea mays OX=4577 GN=103642147 PE=2 SV=1
map00630 Glyoxylate and dicarboxylate metabolism	0.0426874	3.82	O24574	Ribulose bisphosphate carboxylase small chain OS=Zea mays OX=4577 GN=ZEAMMB73_Zm00001d004894 PE=2 SV=1
map00710 Carbon fixation in photosynthetic organisms	0.195914	2.45	A0A1D6GCA1	Malic enzyme OS=Zea mays OX=4577 GN=ZEAMMB73_Zm00001d012764 PE=3 SV=1
map00710 Carbon fixation in photosynthetic organisms	0.195914	2.45	O24574	Ribulose bisphosphate carboxylase small chain OS=Zea mays OX=4577 GN=ZEAMMB73_Zm00001d004894 PE=2 SV=1
map00910 Nitrogen metabolism	0.0175746	9.68	B4FYX5	Pentatricopeptide (PPR) repeat protein-like OS=Zea mays OX=4577 GN=100274074 PE=2 SV=1
map00910 Nitrogen metabolism	0.0175746	9.68	B4FMX4	Glutamine synthetase OS=Zea mays OX=4577 GN=103642147 PE=2 SV=1
map00940 Phenylpropanoid biosynthesis	0.000589666	5.58	C0HIT1	Peroxidase OS=Zea mays OX=4577 GN=ZEAMMB73_Zm00001d032405 PE=2 SV=1
map00940 Phenylpropanoid biosynthesis	0.000589666	5.58	B4FYU6	Peroxiredoxin OS=Zea mays OX=4577 GN=100037830 PE=2 SV=1
map00940 Phenylpropanoid biosynthesis	0.000589666	5.58	A0A1D6QGI0	Peroxidase OS=Zea mays OX=4577 GN=ZEAMMB73_Zm00001d052336 PE=3 SV=1
map00940 Phenylpropanoid biosynthesis	0.000589666	5.58	K7TID5	Peroxidase OS=Zea mays OX=4577 GN=ZEAMMB73_Zm00001d024753 PE=3 SV=1
map00940 Phenylpropanoid biosynthesis	0.000589666	5.58	A0A1D6N0K3	Peroxidase OS=Zea mays OX=4577 GN=ZEAMMB73_Zm00001d042022 PE=3 SV=1
map00940 Phenylpropanoid biosynthesis	0.000589666	5.58	A0A1D6JAB3	Beta-glucosidase 47 OS=Zea mays OX=4577 GN=100193998 PE=3 SV=1
map04141 Protein processing in endoplasmic reticulum	0.278712	1.81	Q5EUE1	Protein disulfide-isomerase OS=Zea mays OX=4577 GN=PDIL1-1 PE=2 SV=1
map04141 Protein processing in endoplasmic reticulum	0.278712	1.81	A0A1D6I5N9	Protein disulfide-isomerase OS=Zea mays OX=4577 GN=606479 PE=3 SV=1
map04141 Protein processing in endoplasmic reticulum	0.278712	1.81	O64960	23.6 kDa heat shock protein mitochondrial OS=Zea mays OX=4577 GN=hsp22 PE=2 SV=1
map04141 Protein processing in endoplasmic reticulum	0.278712	1.81	A0A1D6L5Q6	SecY protein transport family protein OS=Zea mays OX=4577 GN=100276798 PE=3 SV=1
map04145 Phagosome	0.180903	2.58	A0A1D6L5Q6	SecY protein transport family protein OS=Zea mays OX=4577 GN=100276798 PE=3 SV=1
map04145 Phagosome	0.180903	2.58	A0A1D6NEI0	Late embryogenesis abundant protein, group 3 OS=Zea mays OX=4577 GN=100286330 PE=4 SV=1
